# Supplementary material for: Impact of Timing following Acute Myocardial Infarction on Efficacy and Safety of Bone Marrow Stem Cells Therapy: A Network Meta-Analysis
Source: PubMed Central journal article supplement (PMC4691493; doi:10.1155/2016/1031794), 2015-12-13
Supplement: 1031794.f1.pdf [file 1031794.f1.pdf]

**Supplementary Table S1. Characteristics of Studies Included in the Meta-Analysis**

| Source                 | N<br>(SCs vs.<br>control) | Age,yrs                    |                            | Cell type              | Number of<br>injected<br>cells(10 <sup>6</sup> ) | Route of<br>injection | Time From AMI<br>to injection<br>(days) | Imaging<br>modalities | Follow-up<br>(months) |      |
|------------------------|---------------------------|----------------------------|----------------------------|------------------------|--------------------------------------------------|-----------------------|-----------------------------------------|-----------------------|-----------------------|------|
|                        |                           | SCs                        | Control                    |                        |                                                  |                       |                                         |                       |                       |      |
| Assmus B<br>(2010)     | 204(1:1)                  | 56(11)                     |                            | BMCs                   | 236(174)                                         | IC                    | 3-7 <sup>#</sup>                        | Echo/ cMRI            | 6,24                  |      |
| Cao F<br>(2009)        | 86(1:1)                   | 50.7(1.1)                  | 51.0(1.0)                  | BMMNCs                 | 50(12)                                           | IC                    | 7                                       | Echo/SPECT            | 6,12                  |      |
| Colombo A<br>(2011)    | 10(1:1)                   | 54(47-60)<br><sup>Δ</sup>  | 56<br>(44–58) <sup>Δ</sup> | CD133+ cells           | 5.9[4.9-13.5] <sup>Δ</sup>                       | IC                    | 10-14 <sup>#</sup>                      | Echo/SPECT            | 12                    |      |
| Castellani M<br>(2010) | 10(1:1)                   | 30-64 <sup>#</sup>         |                            | CD133+ cells           | 5.9 (4.9 6-<br>13.5) <sup>Δ</sup>                | IC                    | 11-15 <sup>#</sup>                      | Echo/SPECT/cMRI       | 3,6,12                |      |
| Chen SL<br>(2004)      | 69(1:1)                   | 58(7)                      | 57(5)                      | MSCs                   | 48000-60000 <sup>#</sup>                         | IC                    | 18.4(0.5)                               | Echo                  | 3,6                   |      |
| Ge J<br>(2006)         | 20(1:1)                   | 58(11)                     | 59(8)                      | BMMNCs                 | 40                                               | IC                    | < 1                                     | Echo/SPECT            | 6                     |      |
| GrajeK S<br>(2010)     | 45(1:1)                   | 49.9<br>(8.4)              | 50.9<br>(9.3)              | BMCs                   | 410(180)                                         | IC                    | 4-6 <sup>#</sup>                        | Echo/SPECT/cMRI       | 6,12                  |      |
| Gao LR<br>(2013)       | 43(1:1)                   | 55.0<br>(1.6) <sup>+</sup> | 58.6<br>(2.5) <sup>+</sup> | MSCs                   | 3.08(0.52) <sup>+</sup>                          | IC                    | 17.1(0.6) <sup>+</sup>                  | Echo/SPECT            | 6,12,24               |      |
| Hirsch A<br>(2011)     | 134(1:1)                  | 56(9)                      | 55(10)                     | BMMNCs                 | 296(164)                                         | IC                    | 3-8 <sup>#</sup>                        | Echo/cMRI             | 4                     |      |
| Herbots L<br>(2009)    | 67(1:1)                   | 55(11)                     | 58(10)                     | BMCs                   | 172(72)                                          | IC                    | <1                                      | Echo/cMRI             | 4                     |      |
| Huang RC<br>(2006)     | 40(1:1)                   | 57.3<br>(10.1)             | 56.7<br>(9.2)              | BMCs                   | 420(180)                                         | IC                    | <1                                      | Echo                  | 6                     |      |
| Huikuri HV<br>(2008)   | 80(1:1)                   | 60(10)                     | 59(10)                     | BMMNCs                 | 360                                              | IC                    | 2-6 <sup>#</sup>                        | Echo/ LV Angio        | 6                     |      |
| Janssens S<br>(2006)   | 67(1:1)                   | 55.8(11)                   | 57.9(10)                   | BMCs                   | 172(72)                                          | IC                    | < 1                                     | Echo/cMRI             | 4                     |      |
| Lee JM<br>(2014)       | 58 (1:1)                  | 53.9<br>(10.5)             | 54.2<br>(7.7)              | MSCs                   | 72(9)                                            | IC                    | 25(2.4)                                 | Echo/SPECT            | 6                     |      |
| Meyer GP<br>(2006)     | 60(1:1)                   | 53.4(14.8<br>)             | 59.2(13.5<br>)             | BMCs                   | 2460(940)                                        | IC                    | 4.8(1.3)                                | cMRI                  | 6,18                  |      |
| Meluzín, J<br>(2008)   | 60(1:1:1)                 | 54<br>(2) <sup>+</sup>     | 54<br>(2) <sup>+</sup>     | 55<br>(2) <sup>+</sup> | BMMNCs                                           | 10 100                | IC                                      | 5-9 <sup>#</sup>      | Echo/ SPECT           | 6,12 |
| Nogueira FB<br>(2009)  | 20(2:1)                   | 59.7<br>(14.3)             | 57.2<br>(10.8)             | BMMNCs                 | 100 100                                          | IC                    | 5.5 (1.28)                              | Echo                  | 3,6                   |      |
| Piepoli MF<br>(2010)   | 38(1:1)                   | 63.1<br>(2.4) <sup>+</sup> | 67.0<br>(2.7) <sup>+</sup> | BMMNCs                 | 418                                              | IC                    | 4-8 <sup>#</sup>                        | Echo/ SPECT           | 3,6,12                |      |

|                                     |            |                                  |                                  |                         |                               |          |    |                                       |  |                  |       |
|-------------------------------------|------------|----------------------------------|----------------------------------|-------------------------|-------------------------------|----------|----|---------------------------------------|--|------------------|-------|
| Plewka M (2011)                     | 56(2:1)    | 56 (9)                           |                                  | BMMNCs                  | 144 (49)                      |          | IC | 7                                     |  | Echo             | 6     |
| Penicka M (2007)                    | 27(2:1)    | 59 (12)                          |                                  | BMMNCs                  | 2640(1960-3300) <sup>Δ</sup>  |          | IC | 9 (4-11) <sup>Δ</sup>                 |  | Echo             | 4     |
| Quyyumi AA (2011)                   | 31(1:1)    | 52.0<br>(47.5-63.5) <sup>Δ</sup> | 52.0<br>(47.0-57.0) <sup>Δ</sup> | CD34+ cells             | 9.7 (4.1)                     |          | IC | 8.3                                   |  | Echo/SPECT/cMRI  | 3, 6  |
| Suárezde Lezo J (2007)              | 20(1:1)    | 52(12) 55(11)                    |                                  | BMMNCs                  | 900(300)                      |          | IC | 7(5-12) <sup>Δ</sup>                  |  | Echo             | 3     |
| Sürder D (2013)                     | 195(1:1:1) | 55(15) <sup>*</sup>              | 62 (15) <sup>*</sup>             | 56 (14.5) <sup>*</sup>  | BMMNCs                        | 153 153  | IC | 5 -7 <sup>#</sup> 21 -28 <sup>#</sup> |  | cMRI             | 4     |
| Tendera M (2009)                    | 200(2:2:1) | 55 (37-74) <sup>Δ</sup>          | 58 (30-75) <sup>Δ</sup>          | 59 (37-73) <sup>Δ</sup> | BMMN Cs<br>CD34+ CXCR4+ cells | 178 1.90 | IC | 3-12 <sup>#</sup>                     |  | cMRI             | 6     |
| Traverse JH <sup>&amp;</sup> (2012) | 67(2:1)    | 55.6 (10.8)                      | 57.0 (12.4)                      | BMMNCs                  | 146(22.3)                     |          | IC | 3                                     |  | cMRI             | 6     |
| Traverse JH <sup>&amp;</sup> (2012) | 53(2:1)    | 58.2 (11.3)                      | 57.0 (8.0)                       | BMMNCs                  | 146(12)                       |          | IC | 7                                     |  | cMRI             | 6     |
| Traverse JH (2010)                  | 40(3:1)    | 52.5 (43-64) <sup>Δ</sup>        | 57.5 (54-59) <sup>Δ</sup>        | BMMNCs                  | 100                           |          | IC | 3-10 <sup>#</sup>                     |  | Echo/cMRI        | 3,6   |
| Traverse JH (2011)                  | 87(2:1)    | 57 (11) 54.6(11)                 |                                  | BMMNCs                  | 150                           |          | IC | 14-21 <sup>#</sup>                    |  | Echo/cMRI        | 6     |
| Turan RG (2012)                     | 62(2:1)    | 61(15) 60(11)                    |                                  | BMMNCs                  | 96(32)                        |          | IC | 7                                     |  | Echo             | 6,12  |
| Wöhrle J (2013)                     | 42(2:1)    | 61.0 (8.1)                       | 61.1 (9.3)                       | BMMNCs                  | 381                           |          | IC | 5-7 <sup>#</sup>                      |  | Echo/ cMRI       | 6     |
| Wen R (2005)                        | 20(1:1)    | 58(7)                            |                                  | BMCs                    | NR                            |          | IC | <1                                    |  | Echo             | 6     |
| Yao K (2009)                        | 24(1:1)    | 52.1 (6.3)                       | 52.7 (7.8)                       | BMCs                    | 190(120)                      |          | IC | 3-7 <sup>#</sup>                      |  | Echo/ SPECT/cMRI | 6, 12 |

Note: Values are presented as mean (SD) or mean. N: number of subjects. SC: stem cells. AMI: Acute Myocardial Infarction. BMCs: Bone Marrow Cells. IC: Intracoronary. Echo: Echocardiography. cMRI: Cardiac Magnetic Resonance Imagine. BMMNCs: Bone Marrow Mononuclear Cells. SPECT: Single-Photon Emission Computed Tomography. NR: Not Record. MSCs: Mesenchymal Stem Cells. LV Angio: Left Ventricular Angiography.<sup>Δ</sup>: Median (ranges). <sup>#</sup>: range. <sup>\*</sup>: mean (SE). <sup>&</sup>: from same study

**Supplementary Table S2. Quality Assessment Scale for the Randomized Controlled Trials Included in the Meta-Analysis**

|                        | Selection                  |                                                   |                                               | Performance were                                    | Detection                           | attrition                          |                                                                                                   |
|------------------------|----------------------------|---------------------------------------------------|-----------------------------------------------|-----------------------------------------------------|-------------------------------------|------------------------------------|---------------------------------------------------------------------------------------------------|
|                        | Was allocation adequate? * | Was an adequate method of randomization described | Were groups similar at the start of the study | the patients/caregivers blinded to the intervention | was the outcome ascertained blindly | What percent was lost to follow-up | Were all patient analyzed in the group to which they were assigned (intention-to-treat analysis)? |
| Assmus B,2010          | Y                          | Y                                                 | Y                                             | Y                                                   | Y                                   | 1.5                                | N                                                                                                 |
| Cao F,2009             | Y                          | Y                                                 | Y                                             | NR                                                  | Y                                   | 0                                  | Y                                                                                                 |
| Colombo A,2011         | Y                          | Y                                                 | Y                                             | Y                                                   | Y                                   | 0                                  | Y                                                                                                 |
| Castellani M,2010      | N                          | N                                                 | Y                                             | N                                                   | N                                   | 0                                  | N                                                                                                 |
| Chen SL,2004           | Y                          | N                                                 | Y                                             | Y                                                   | Y                                   | 0                                  | Y                                                                                                 |
| Gao LR,2013            | Y                          | Y                                                 | Y                                             | N                                                   | Y                                   | 4.7                                | N                                                                                                 |
| Ge J(2006)             | Y                          | Y                                                 | Y                                             | N                                                   | Y                                   | 0                                  | Y                                                                                                 |
| Grajek S(2010)         | Y                          | Y                                                 | Y                                             | N                                                   | Y                                   | 0                                  | N                                                                                                 |
| Huikuri HV(2008)       | Y                          | Y                                                 | Y                                             | Y                                                   | Y                                   | 3.7                                | Y                                                                                                 |
| Herbots L(2009)        | Y                          | Y                                                 | Y                                             | Y                                                   | Y                                   | 1                                  | Y                                                                                                 |
| Hirsch A (2011)        | Y                          | Y                                                 | Y                                             | N                                                   | Y                                   | 2                                  | Y                                                                                                 |
| Huang RC(2006)         | Na                         | Na                                                | Na                                            | Na                                                  | Na                                  | Na                                 | Na                                                                                                |
| Janssens S(2006)       | Y                          | Y                                                 | Y                                             | Y                                                   | Y                                   | 10                                 | Y                                                                                                 |
| Lee JW(2014)           | NR                         | N                                                 | Y                                             | N                                                   | Y                                   | 27.5                               | N                                                                                                 |
| Meluzín J(2008)        | Nr                         | N                                                 | Y                                             | N                                                   | Y                                   | 0                                  | Y                                                                                                 |
| Meyer GP(2006)         | Y                          | Y                                                 | Y                                             | Y                                                   | Y                                   | 0                                  | Y                                                                                                 |
| Nogueira FB(2009)      | Y                          | Y                                                 | Y                                             | N                                                   | Y                                   | 0                                  | Y                                                                                                 |
| Piepoli MF(2010)       | Y                          | Y                                                 | Y                                             | NR                                                  | NR                                  | 0                                  | Y                                                                                                 |
| Plewka M(2011)         | N                          | N                                                 | Y                                             | N                                                   | N                                   | 13.3                               | N                                                                                                 |
| Penicka M(2007)        | Y                          | Y                                                 | NR                                            | NR                                                  | NR                                  | 11                                 | N                                                                                                 |
| Quyyumi AA (2011)      | Y                          | N                                                 | Y                                             | N                                                   | Y                                   | 3.2                                | N                                                                                                 |
| Sürder D (2013)        | Y                          | Y                                                 | Y                                             | N                                                   | Y                                   | 16.5                               | N                                                                                                 |
| Suárezde Lezo J (2007) | Y                          | Y                                                 | Y                                             | NR                                                  | Y                                   | 0                                  | Y                                                                                                 |
| Tendera M (2009)       | Y                          | Y                                                 | Y                                             | N                                                   | Y                                   | 0                                  | Y                                                                                                 |
| Traverse JH (2012)     | Y                          | Y                                                 | Y                                             | Y                                                   | Y                                   | 6.7                                | N                                                                                                 |
| Traverse JH (2011)     | Y                          | N                                                 | Y                                             | N                                                   | Y                                   | 1.1                                | Y                                                                                                 |
| Traverse JH (2010)     | Y                          | Y                                                 | Y                                             | Y                                                   | Y                                   | 0                                  | Y                                                                                                 |
| Turan RG (2012)        | NR                         | N                                                 | Y                                             | N                                                   | Y                                   | 0                                  | Y                                                                                                 |
| Wen R (2005)           | Y                          | N                                                 | Y                                             | Y                                                   | Y                                   | 0                                  | Y                                                                                                 |
| Wöhrle J (2013)        | Y                          | Y                                                 | Y                                             | Y                                                   | Y                                   | 4.7                                | Y                                                                                                 |
| Yao K (2009)           | Y                          | Y                                                 | Y                                             | NR                                                  | Y                                   | 13                                 | N                                                                                                 |

NA indicates not available; NR, not reported.

\*Adequate means the use of central site, numeric code, opaque envelopes, drugs prepared by pharmacy, and other appropriate procedures as described by Juni et al.<sup>50</sup>

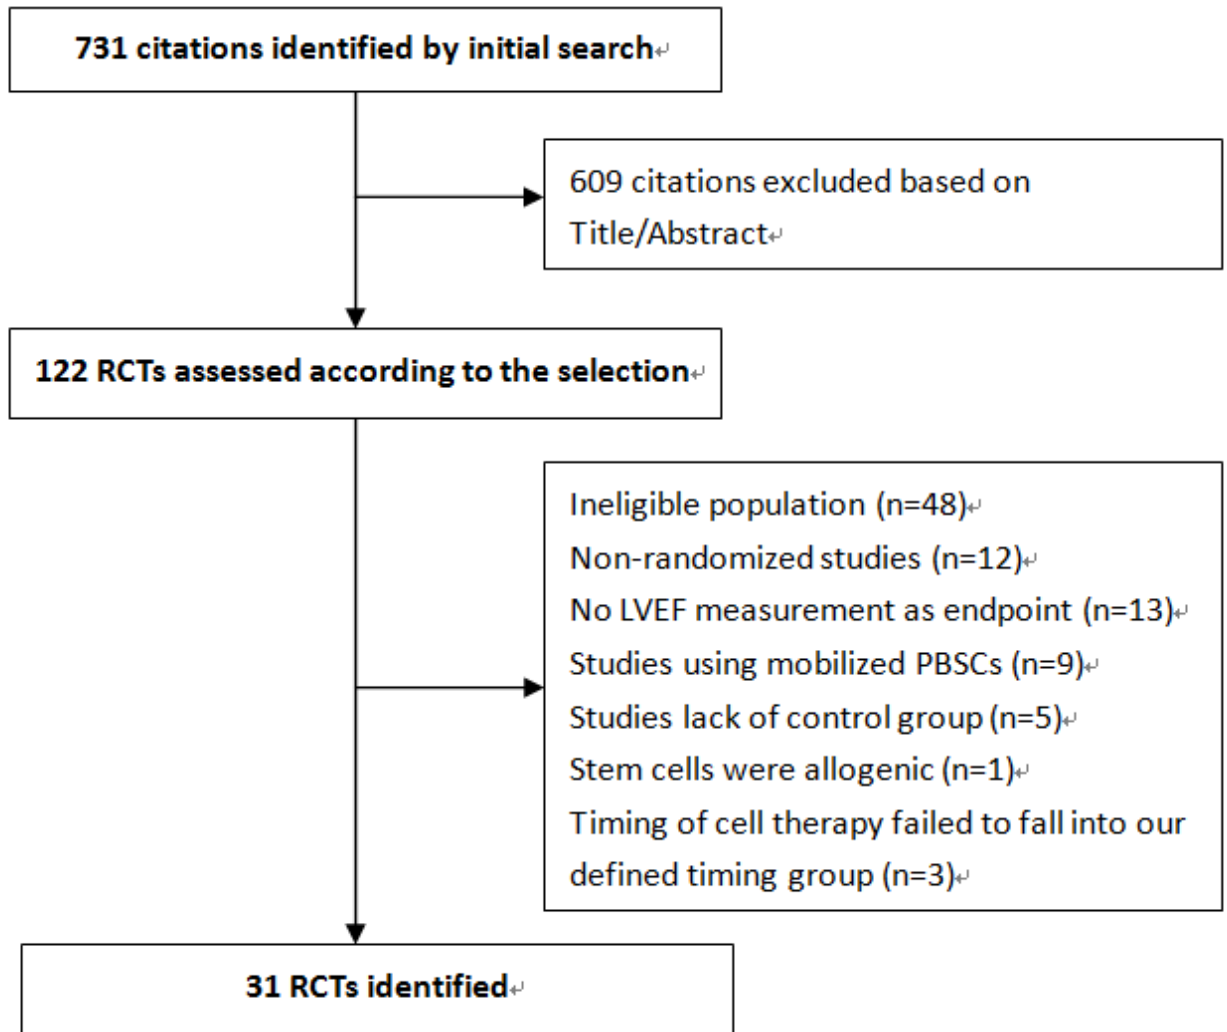

**Supplementary Figure S1. Flow Diagram of Eligible Studies of Bone Marrow Stem Cells Therapy in Patients with Acute Myocardial Infarction.** RCTs, randomized clinical trials. LVEF, left ventricular ejection fraction.

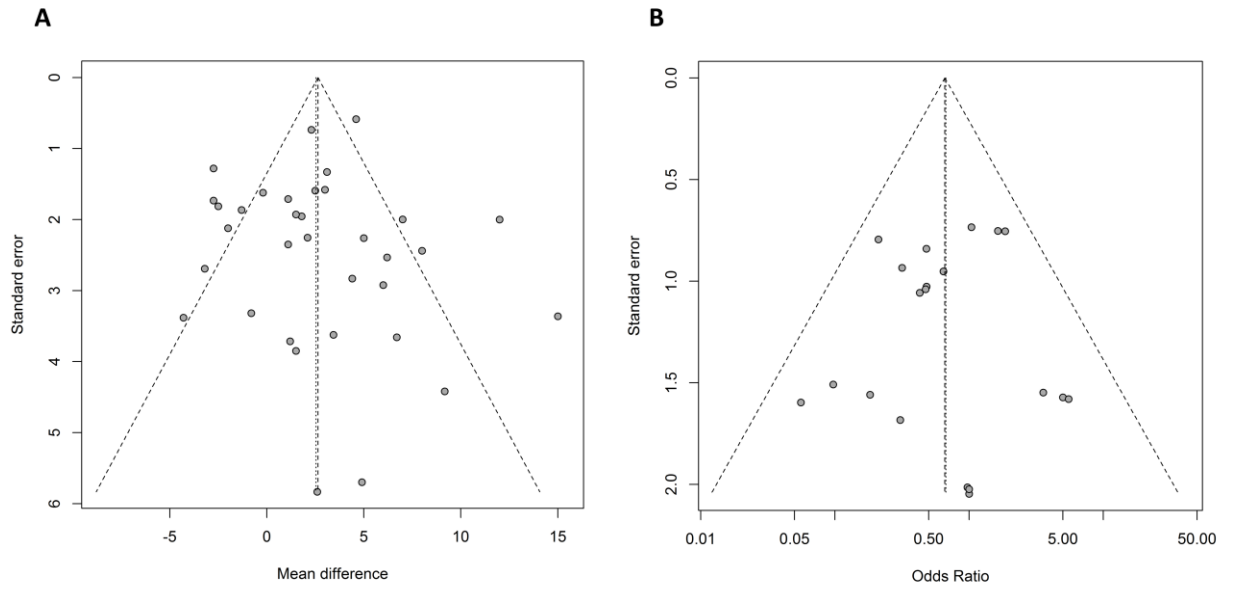

**Supplementary Figure S2. Funnel Plot. (A) Funnel Plot of Left Ventricular Ejection Friction, and (B) Funnel Plot of Major Adverse Cardiac Events**
